# Supplementary material for: Depletion of Histone Demethylase Jarid1A Resulting in Histone Hyperacetylation and Radiation Sensitivity Does Not Affect DNA Double-Strand Break Repair
Source: PLOS journal article supplement (doi:10.1371/journal.pone.0156599), 2016-06-02

scr

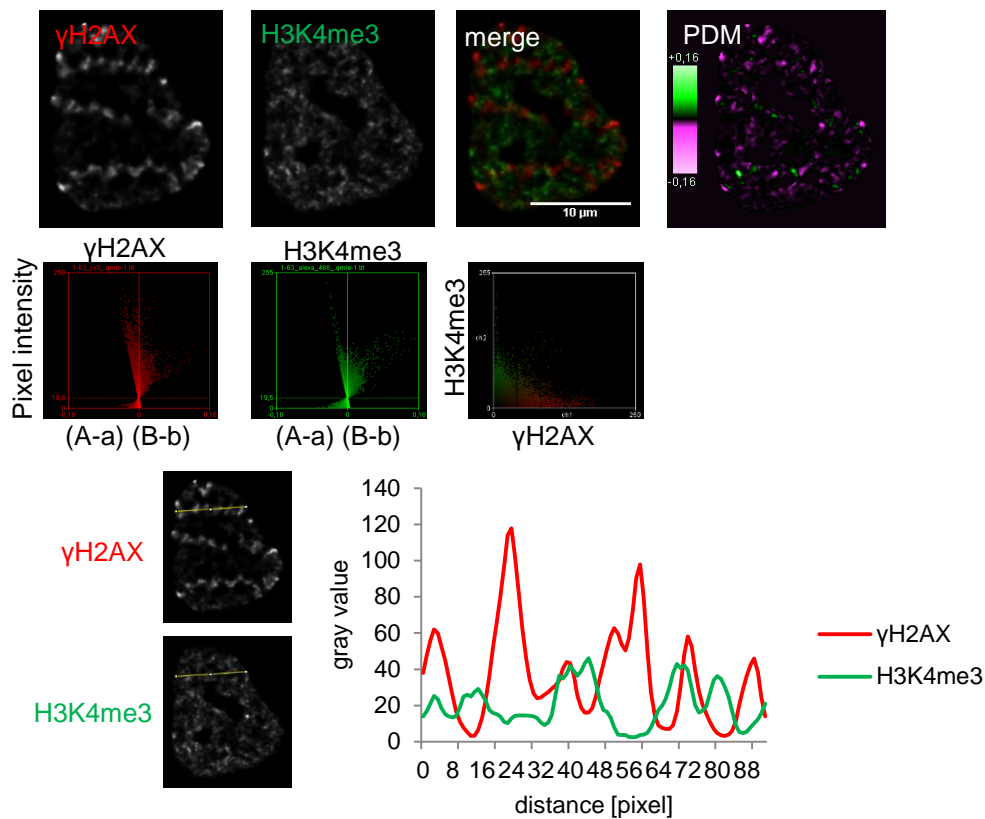

Jarid1A A1+A3

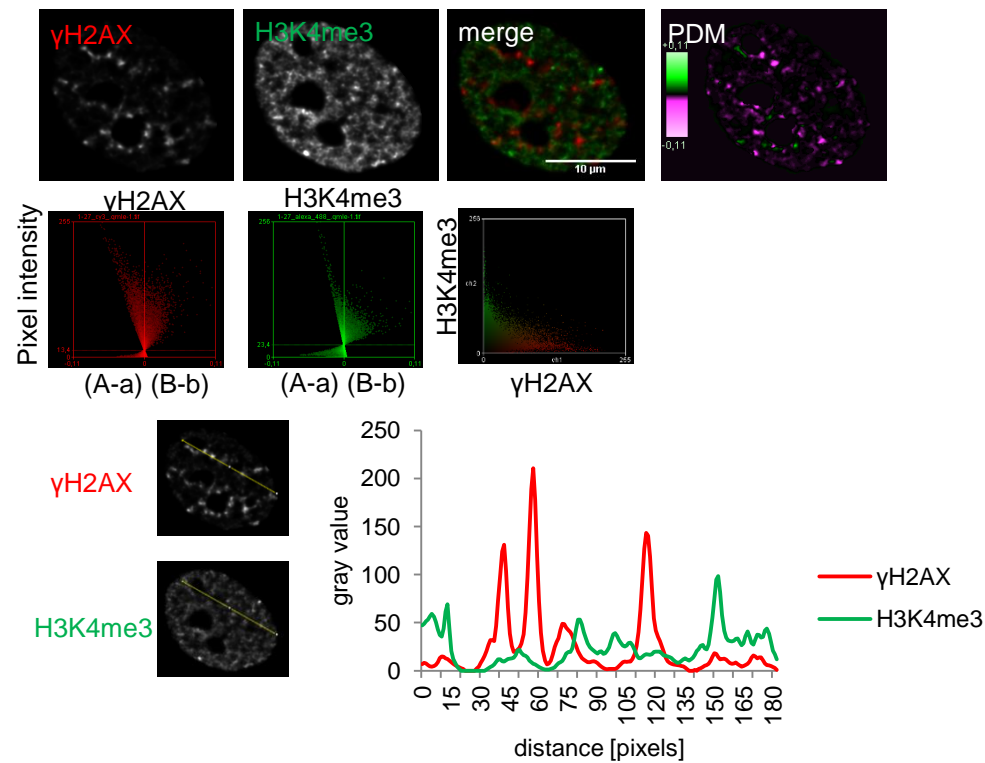

scr

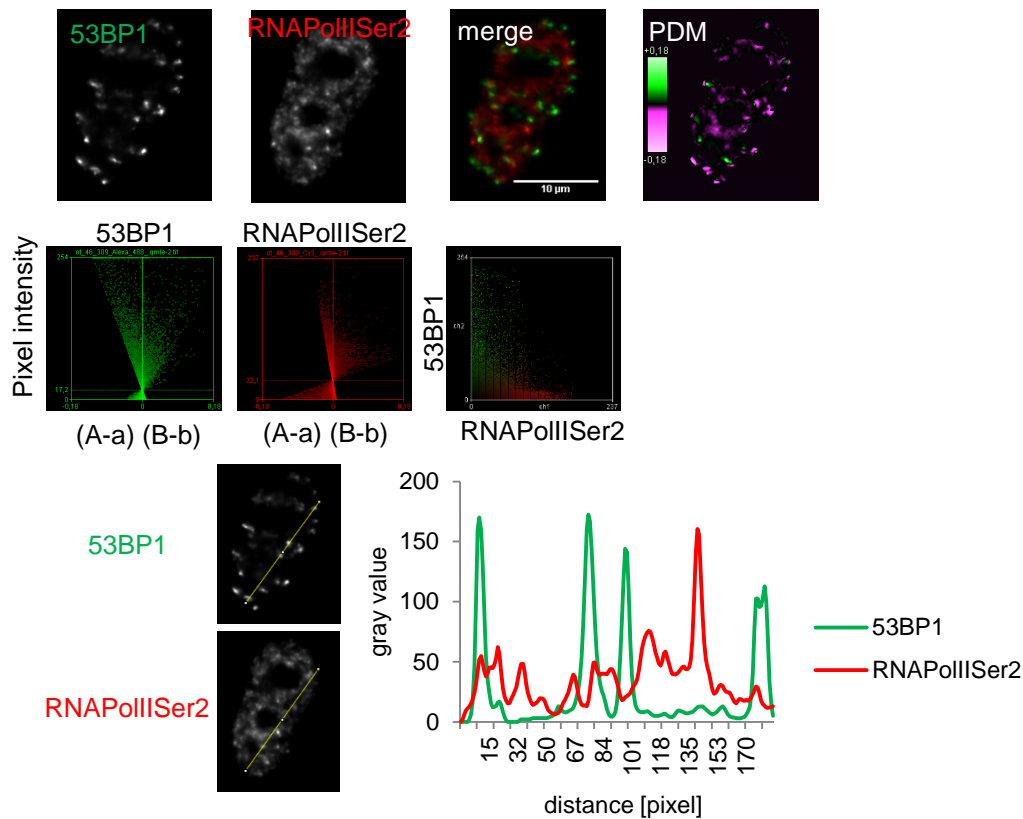

Jarid1A A1+A3

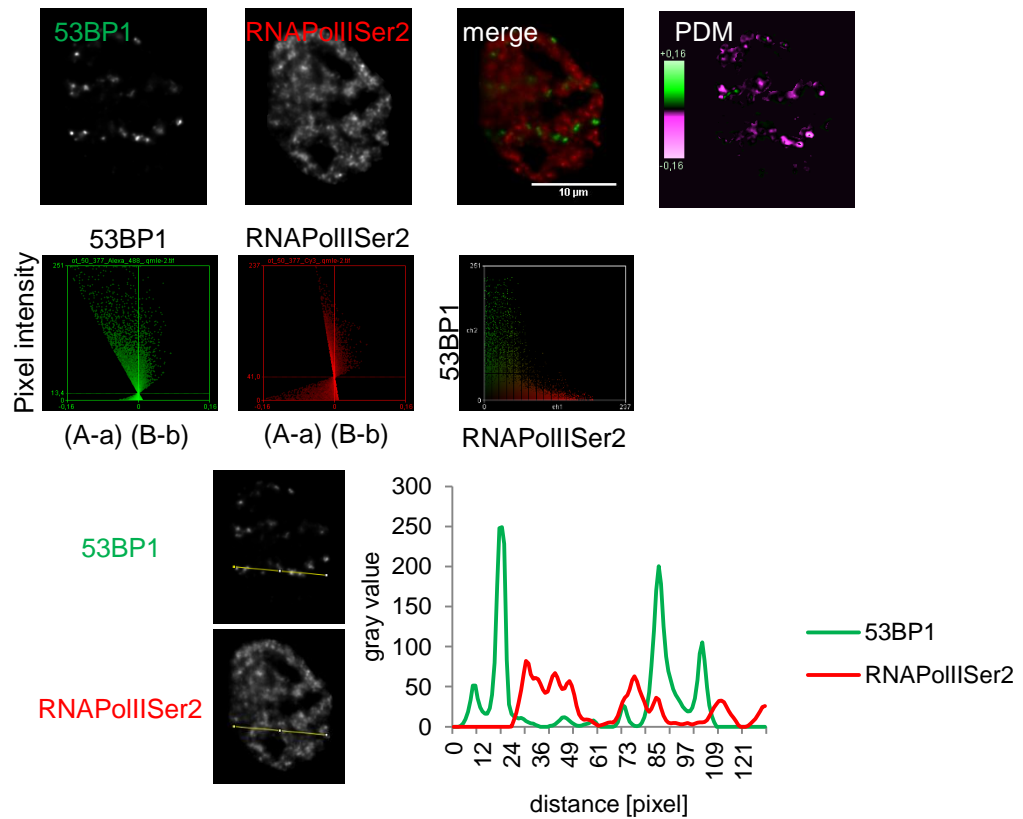

Supplement: S5 (10.1371/journal.pone.0156599.s005) [file journal.pone.0156599.s005.PDF › journal.pone.0156599.s005.PDF]
